# Supplementary material for: Out-of-plane pressure and electron doping inducing phase and magnetic transitions in GeC/CrS2/GeC van der Waals heterostructure
Source: Royal Society of Chemistry journal article supplement (doi:10.1039/d3nr05610d), 2024-01-01
Supplement: d3nr05610d1.pdf [file d3nr05610d1.pdf]

## Supplementary information:

### Out-of-Plane Pressure and Electron Doping Inducing Phase and Magnetic Transition in GeC/CrS<sub>2</sub>/GeC van der Waals Heterostructure

*Kaiyun Chen<sup>1</sup>, Xue Yan<sup>2</sup>, Junkai Deng<sup>3, a)</sup>, Cunle Bo<sup>3</sup>, Mengshan Song<sup>1</sup>, Dongxiao Kan<sup>1</sup>, Jiabei He<sup>1</sup>, Wangtu Huo<sup>1</sup> and Jefferson Zhe Liu<sup>2, b)</sup>*

<sup>1</sup> Northwest Institute for Nonferrous Metal Research, Xi'an 710016, China

<sup>2</sup> Department of Mechanical Engineering, The University of Melbourne, Parkville, VIC 3010, Australia

<sup>3</sup> State Key Laboratory for Mechanical Behavior of Materials, Xi'an Jiaotong University, Xi'an 710049, China

E-mail: <sup>a)</sup>junkai.deng@mail.xjtu.edu.cn; <sup>c)</sup>zhe.liu@unimelb.edu.au

## Supplementary Note 1: Lattice constant matching and stacking type between GeC and CrS<sub>2</sub>.

In Table S1, we summarized the lattice constants of a series of honey-comb like 2D materials including BN, AlN, GaN, SiC, GeC, graphene, silene and germanene. The lattice mismatch along the  $x$ - and  $y$ -direction is defined as  $\varepsilon_x = (a-a_0)/a_0$  and  $\varepsilon_y = (b-b_0)/b_0$ , where  $a$  and  $b$  are the lattice constant of 2D-honeycomb materials. The  $b_0 = 3.325 \text{ \AA}$  and  $b_0 = 5.626 \text{ \AA}$  is the lattice constant of 1T'-CrS<sub>2</sub> along the  $x$ - and  $y$ -direction, respectively. The lattice constants of each 2D-honeycomb material and their corresponding mismatch compared to 1T'-CrS<sub>2</sub> are summarized in Table S1. Among these eight candidates, GeC should be the appropriate one for constructing vdWH with CrS<sub>2</sub> because of the smallest mismatch ( $\varepsilon_x = 2.9\%$  and  $\varepsilon_y = 0.6\%$ ) compared with other materials.

The stacking type was also considered for vdWH. Based on the relationship between S and Ge atoms, there are three different stacking orders, as shown in Supplementary Fig. S1. The Ge atom might correspond to Cr, top S, and bottom S, respectively. Here, these three stacking types are denoted as Ge-Cr, Ge-S<sub>u</sub>, and Ge-S<sub>b</sub>, and both single layer and double layer on two sides of CrS<sub>2</sub> are considered. Table S2 summarizes the relative energy of these stacking types. The relative energies of the Ge-S<sub>u</sub> stacking in both single and double GeC layer structures are smaller than that of Ge-Cr and Ge-S<sub>d</sub> stacking types. Therefore, the Ge-S<sub>u</sub> stacking type is adopted in the GeC/CrS<sub>2</sub>/GeC vdWHs.

**Table S1** The lattice constants of some graphene-like 2D materials. The  $\varepsilon_x$  and  $\varepsilon_y$  are the lattice constant mismatch between 2D-honeycomb materials and 1T'-CrS<sub>2</sub> along the  $x$ - and  $y$ -direction, respectively.

| Lattice constant    | BN      | AlN    | GaN    | SiC    | GeC    | C       | Si     | Ge     |
|---------------------|---------|--------|--------|--------|--------|---------|--------|--------|
| $a$ (Å)             | 2.503   | 3.114  | 3.193  | 3.093  | 3.230  | 2.464   | 3.868  | 4.034  |
| $b$ (Å)             | 4.336   | 5.393  | 5.531  | 5.356  | 5.595  | 4.268   | 6.699  | 6.986  |
| $\varepsilon_x$ (%) | -24.709 | -6.343 | -3.959 | -6.992 | -2.842 | -25.891 | 16.323 | 21.310 |
| $\varepsilon_y$ (%) | -22.927 | -4.130 | -1.689 | -4.798 | -0.546 | -24.133 | 19.076 | 24.180 |

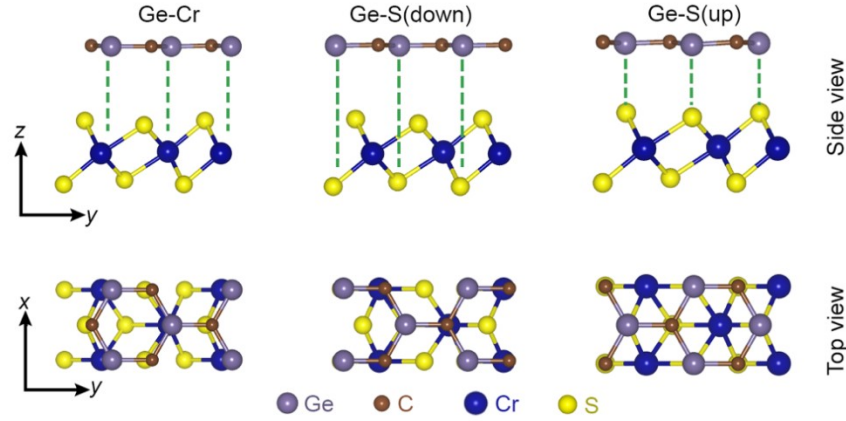

**Figure S1** The three possible stacking types of GeC/CrS<sub>2</sub> heterostructure. There is three possible stacking type, of which Ge is on Cr, S (down), and S (up) atom respectively.

**Table S2** The energy of different stacking types of GeC/CrS<sub>2</sub> and GeC/CrS<sub>2</sub>/GeC van der Waals heterostructure corresponding to Fig. S1. The SL and TL mean the single GeC layer on one side and two GeC layers on two sides.

| Energy (eV) | Ge-Cr    | Ge-S <sub>u</sub> | Ge-S <sub>d</sub> |
|-------------|----------|-------------------|-------------------|
| SL          | 0.125247 | 0                 | 0.046789          |
| TL          | 0.245552 | 0                 | 0.089268          |

## Supplementary Note 2: Energy barriers and phase transition under *out-of-plane* compression

The energy barriers for the phase transition between 1T'-FM and 1T-AFM were calculated through the climbing image nudged elastic band (CI-NEB) method. Considering the CI-NEB is difficult to involve a magnetic transition between AFM and FM, a semi-quantitatively method was adopted to estimate the energy barrier between 1T'-FM and 1T-AFM with and without compression. We first calculated the nonmagnetic 1T-1T' transition process to approximate transition coordinates. Then self-consistent calculations were performed on each coordinate with AFM and FM magnetic order. The magnetic order with lower total energy at each coordinate is adopted to approximately describe the energy barrier between 1T-AFM and 1T'-FM phase.

Figure S2 is the results of CI-NEB calculations from 1T'-FM to 1T-AFM with  $d_l = 8.86 \text{ \AA}$  (relaxed state of GeC/1T'-FM-CrS<sub>2</sub>/GeC) and  $d_l = 8.00 \text{ \AA}$  (compressed). Obviously, under compression ( $d_l$  decreases to  $8.00 \text{ \AA}$ ), the energy of 1T'-FM is lower than that of 1T-AFM, and the 1T'-FM to 1T-AFM barrier decreases from  $48.1 \text{ meV/f.u.}$  to  $15.2 \text{ meV/f.u.}$ , which also suggests the possibility for 1T'-FM to 1T-AFM transition of CrS<sub>2</sub> vdWH.

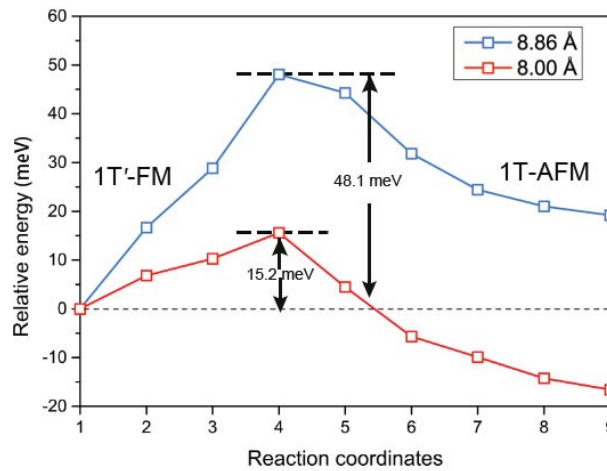

**Figure S2** The energy barrier between 1T'-FM and 1T-AFM CrS<sub>2</sub> in GeC/CrS<sub>2</sub>/GeC with  $d_l = 8.86 \text{ \AA}$  and  $8.00 \text{ \AA}$ .

To identify the phase of CrS<sub>2</sub> in GeC/CrS<sub>2</sub>/GeC vdWHs when  $d_l < 7.74 \text{ \AA}$ , the distance ratio  $d_{Cr1-Cr2}/d_{Cr2-Cr3}$  is adopted to identify the structure character (the number of each atoms are denoted in Fig. S3a). Figure S3b depicts the  $d_{Cr1-Cr2}/d_{Cr2-Cr3}$  of FM-CrS<sub>2</sub> as the function of  $d_l$ . The  $d_{Cr1-Cr2}/d_{Cr2-Cr3}$  slightly increases to  $\sim 9.00$  as  $d_l$  decreases to  $\sim 8.00 \text{ \AA}$ . After that, the abrupt change of

$d_{Cr1-Cr2}/d_{Cr2-Cr3}$  to  $\sim 0.98$  could be observed, and it increases continuously, approaching near 1 as the  $d_l$  decreases. The  $d_{Cr1-Cr2}/d_{Cr2-Cr3}$  should equal to 1 in the high symmetry 1T phase, while it should be less than 1 in 1T' phase. Thus, this result suggests the spontaneous phase transition from 1T' to 1T phase. Here, we also summarized the relationship between the S-Cr-S(Cr-S-Cr) angle of FM-CrS<sub>2</sub> and  $d_l$  as depicted in Supplementary Fig. S3c. All angles abruptly change to  $\sim 90^\circ$  also confirming the 1T'-to-1T transition.

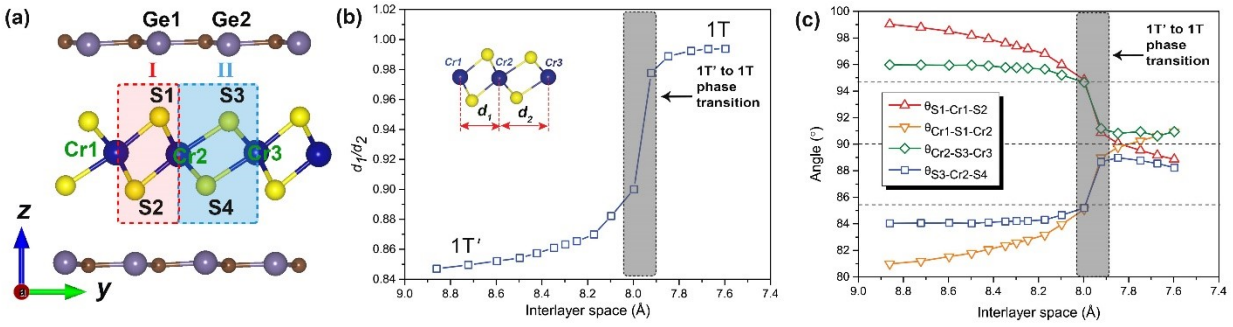

**Figure S3** The structure parameter changing of FM-CrS<sub>2</sub> in GeC/CrS<sub>2</sub>/GeC during the compression. (a) The schematic of the initial crystal of GeC/1T'-CrS<sub>2</sub>/GeC vdWHs. (b) The  $d_1/d_2$  ratio of FM CrS<sub>2</sub>. (c) The  $\theta_{S1-Cr1-S2}$ ,  $\theta_{Cr1-S1-Cr2}$ ,  $\theta_{S3-Cr2-S4}$ ,  $\theta_{Cr2-S3-Cr3}$  changing of FM CrS<sub>2</sub> as the interlayer space decreases. The black dot line at  $85.4^\circ$  and  $94.6^\circ$  corresponds to the ground state of monolayer 1T-CrS<sub>2</sub>. The sharp change in (b) and (c) highlighted by the grey dot rectangle corresponds to the spontaneous phase transition from 1T' to 1T.

### Supplementary Note 3: The *out-of-plane* compression, electron doping and uniaxial *in-plane* strain of monolayer CrS<sub>2</sub>

To identify the indispensability of GeC layers, *i.e.*, interlayer interaction, the *out-of-plane* compression, uniaxial *in-plane* strain and electron doping are adopted to induced phase transition from 1T'-FM to 1T-AFM in monolayer CrS<sub>2</sub> shown in Fig. S4. It can be observed that the 1T'-FM is always energetically favourable compared with 1T-AFM. In addition, we also summarized the  $d_1/d_2$  ration and S-Cr-S angles corresponding to Fig. S4c in Fig. S5a. Only  $\sim 0.7\%$  increase of  $d_1/d_2$  ratio is observed with 10% uniaxial tensile strain applied on monolayer 1T'-FM CrS<sub>2</sub>. Also, the linear decreased  $\theta_2$  and increased  $\theta_1$  suggest the S atoms at each sides turn to close each other without change the 1T' crystal structure.

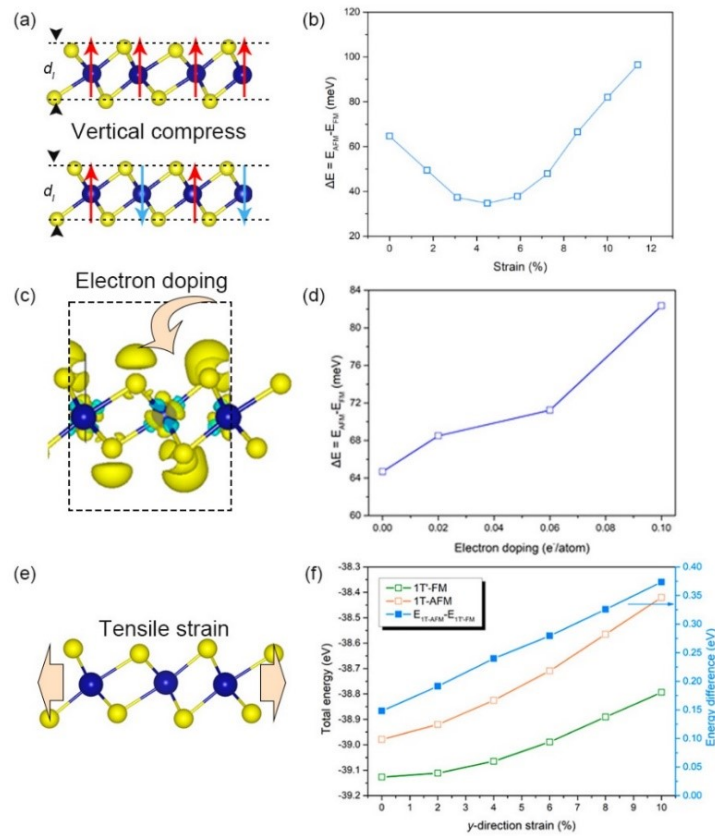

**Figure S4** The energy difference between 1T-AFM and 1T'-FM of monolayer CrS<sub>2</sub> as the function of (a)-(b) vertical compression, (c)-(d) electron doping, and (e)-(f) *y*-direction uniaxial strain. 1T'-FM is always the most stable phase without phase transition being observed.

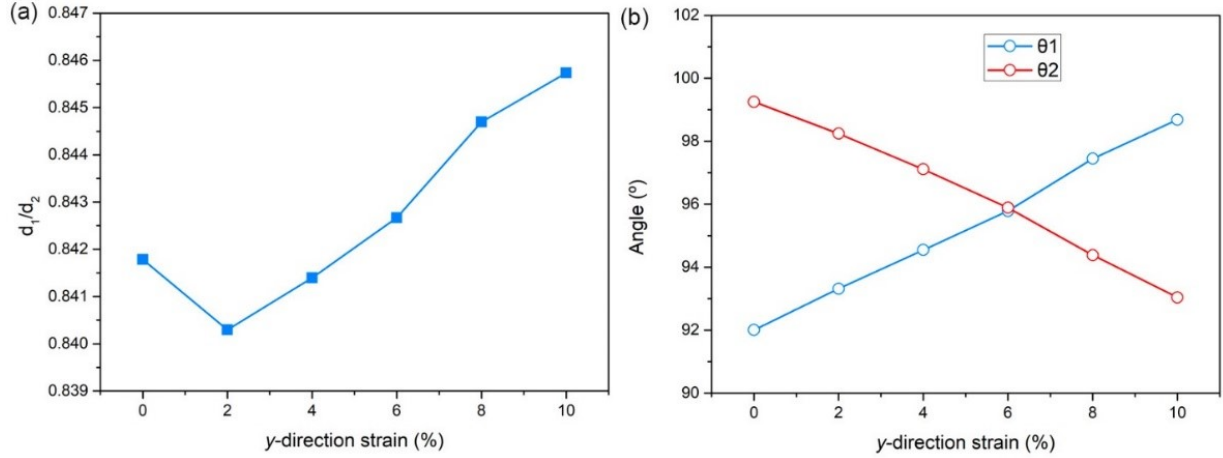

**Figure S5** The structure parameters as a function of the  $y$ -direction tensile strain in 1T'-FM CrS<sub>2</sub>. (a)  $d_1/d_2$  ratio, (b) S-Cr-S angle, in which  $\theta_1$  and  $\theta_2$  corresponds to the inserted figure in Fig. 3c.

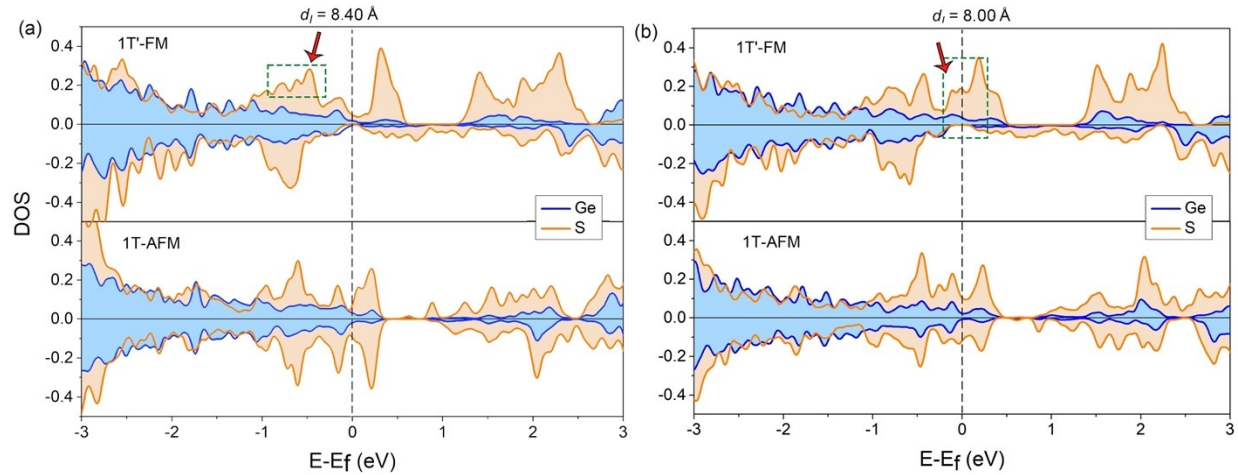

**Figure S6** The projected DOS of Ge and S in GeC/CrS<sub>2</sub>/GeC with different GeC interlayer distance. (a) is the 1T'-FM and 1T-AFM CrS<sub>2</sub> DOS when  $d_I = 8.40 \text{ \AA}$ . (b) is the 1T'-FM and 1T-AFM CrS<sub>2</sub> DOS when  $d_I = 8.00 \text{ \AA}$ .

Here, we also calculated the projected DOS (PDOS) of S and Ge in GeC/CrS<sub>2</sub>/GeC with  $d_I = 8.40 \text{ \AA}$  and  $8.00 \text{ \AA}$  as show in supplementary Fig. S6. At  $d_I = 8.40 \text{ \AA}$ , the peak of S in 1T'-FM and 1T-AFM are not well comparable to Ge, especially the peaks highlighted by the green dot rectangle. In addition, both S and Ge show similar peaks near to the Fermi level. This suggest the weak interaction between S and Ge. As the  $d_I$  decreases to  $8.00 \text{ \AA}$ , more electrons concentrate on Fermi level in 1T'-FM CrS<sub>2</sub> as highlighted in the green dot rectangle. Such a state is not energetical favorable compared to the 1T-AFM of CrS<sub>2</sub>, because the DOS intensity will decrease at Fermi

level. In addition, it can be observed that more profound peak overlap as the electron density increases enhancing Ge and S interaction. Therefore, the enhanced interlayer interaction will make the energy of 1T-AFM lower than that of 1T'-FM.



#### Supplementary Note 4: Calculation of stress-strain curve of GeC/CrS<sub>2</sub>/GeC under out-of-plane compression.

To estimate the possible application of the vertical compress-induced phase and magnetic transition, the compressive strain-stress curve should be calculated to identify whether the stress could be realized in experiments. The compressive stress could be estimated through:

$$P = \Delta E / \Delta V \quad (1)$$

where  $E$  and  $V$  are the total energy and volume of GeC/CrS<sub>2</sub>/GeC heterostructure, respectively. The volume could be defined as  $V = S \times d_l$ , where  $S$  is the surface area of GeC/CrS<sub>2</sub>/GeC in the  $x$ - $y$  plane. The FM state is used to estimate the pressure during the compression process, and the  $E$ - $V$  curve is presented in Supplementary Fig. S7. Then the stress- $d_l$  relationship is depicted in Supplementary Fig. S9. It can be observed that  $\sim 4.3$  GPa is necessary to be applied to trigger 1T'-FM to 1T-AFM ( $d_l = 8.26$  Å) in GeC/CrS<sub>2</sub>/GeC vdWH. Furthermore, the stress along the  $z$ -direction will increase as the interlayer continue decreasing until a plateau ( $\varepsilon \approx 10$  GPa) appears around  $8.00$  Å, which corresponds to the 1T'-FM to 1T-FM spontaneous transition.

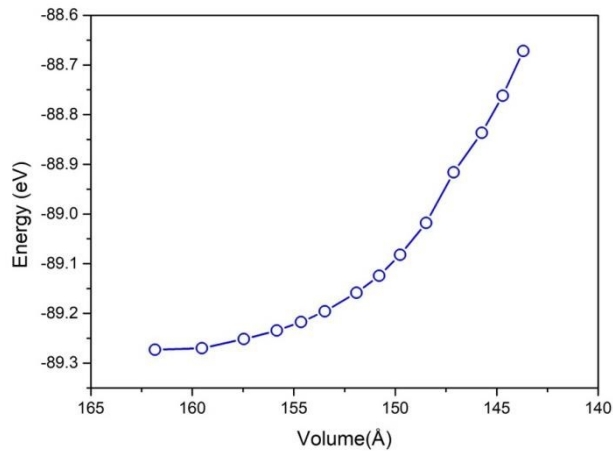

**Figure S7** The relationship between total energy and volume of GeC/1T'-FM-CrS<sub>2</sub>/GeC.

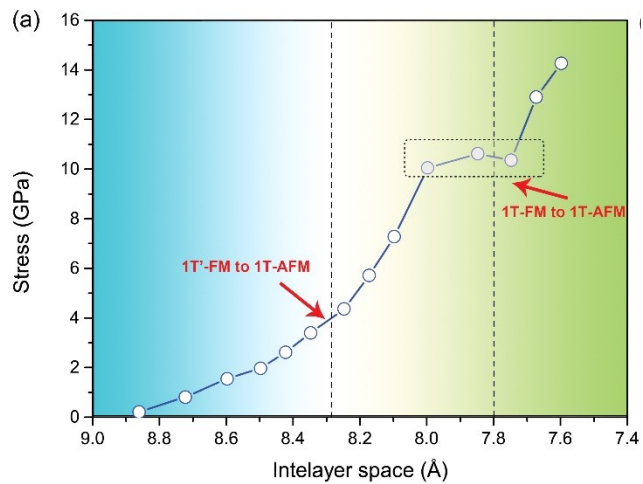

**Figure S8** (a) The relationship between stress and GeC interlayer space of GeC/1T'-FM-CrS<sub>2</sub>/GeC. The 1T'-FM to 1T-AFM transition stress is ~4.3 GPa. The plateau highlighted by the gray rectangle corresponds to the spontaneous 1T' to 1T transition.

## Supplementary Note 5: Direct-to-super exchange transition inducing the 1T-AFM to 1T-FM transition

For the FM 1T phase at  $d_I = 8.00 \text{ \AA}$ , the Cr-X -Cr bond angle is not equal to  $90^\circ$  as shown in Fig. S3. The  $\theta_{\text{Cr1-S1-Cr2}}$  and  $\theta_{\text{Cr2-S3-Cr3}}$  are larger and smaller than  $90^\circ$ . The magnetic moment of S is very close to zero. As reported in previous studies in monolayer  $\text{CrX}_2$  ( $X = \text{S, Se and Te}$ )<sup>1</sup>, the AFM state of the 1T phase arises from the direct exchanging interaction ( $J_D$ ) between the nearest neighbouring Cr atoms as shown in Fig. S9. As the *out-of-plane* compression increase, both  $\theta_{\text{Cr1-S1-Cr2}}$  and  $\theta_{\text{Cr2-S3-Cr3}}$  turn to close to  $90^\circ$ . Considering the number of  $3d$  electrons of the Cr atom, it should be the superexchange to direct exchange interaction transition based on the Goodenough-Kanamori-Anderson (GKA) rules<sup>2-4</sup>. The magnetic moment on S is increased from  $0 \mu_B$  to  $-0.02 \mu_B$ , and opposite to the magnetic moment of Cr ( $2.09 \mu_B$ ).

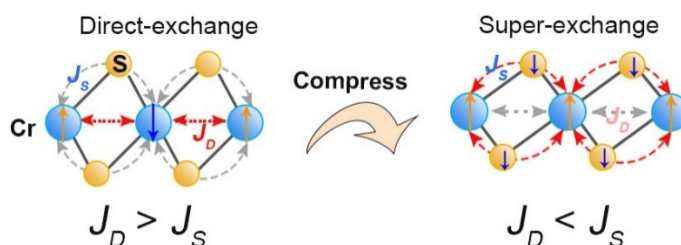

**Figure S9** The different exchange interactions in  $\text{CrS}_2$ . The Cr-Cr direct exchange ( $J_D$ ) under small compression leads to AFM order, while the Cr-S-Cr superexchange ( $J_S$ ) under large compression leads to FM. The orange and blue solid arrow represent the magnetic moment with different signals.

## Supplementary Note 6: Magnetic moment and relative energy of FM/AFM lateral heterostructure.

Here, we constructed two different superlattice of GeC/CrS<sub>2</sub>/GreC, in which the compressed region is 8 and 4 unit cell, respectively. Table S3 summarized the magnetic moment of each Cr atoms in these two superlattice structures. For the 8 units compressed superlattice (4F+8C), Cr1 to Cr4 show FM order in stress free region, while Cr5 to Cr12 show AFM order in compressed region. For the 8 unit compressed superlattice (8F+4C), Cr1 to Cr8 show FM order in stress free region, while Cr9 to Cr12 show AFM order in compressed region. The spin polarized electron density is shown in Fig. 6 in main text.

To identify the ground state in such vdWH, we manually change the magnetic order of compressed region to FM order. The relative energies are summarized in Table S4. For both two superlattice, the AFM order in compressed region is energetical favorable.

**Table S3** Magnetic moment of free and compressed local structure combination with FM+AFM. The magnetic moment of each atom is  $\mu_B$ .

| Atoms    | Cr1   | Cr2   | Cr3   | Cr4   | Cr5   | Cr6    | Cr7   | Cr8    | Cr9   | Cr10   | Cr11  | Cr12   |
|----------|-------|-------|-------|-------|-------|--------|-------|--------|-------|--------|-------|--------|
| 4FM+8AFM | 1.777 | 2.021 | 2.06  | 2.121 | 2.18  | -2.138 | 2.127 | -2.126 | 1.967 | -2.05  | 2.025 | -1.984 |
| 8FM+4AFM | 1.813 | 1.976 | 2.114 | 2.117 | 2.091 | 2.137  | 2.052 | 2.09   | 2.178 | -2.147 | 2.107 | -1.916 |

**Table S4** The energy of relax and compress local structure combination with FM+AFM and FM magnetic order. The unit of each energy is eV.

| $nF+mC$                       | 4F+8C      | 8F+4C      |
|-------------------------------|------------|------------|
| E(nFM+nAFM)                   | -532.36436 | -532.77456 |
| E(nFM+nFM)                    | -532.25102 | -532.74085 |
| $\Delta E(E_{FM+AFM}-E_{FM})$ | 0.11334    | 0.03371    |

## References:

1. Lv, H. Y., Lu, W. J., Shao, D. F., Liu, Y. & Sun, Y. P. Strain-controlled switch between ferromagnetism and antiferromagnetism in 1T-CrX<sub>2</sub> (X=Se, Te) monolayers. *Phys. Rev. B* **92** (2015).

2. Anderson, P. W. New approach to the theory of superexchange interactions. *Phys. Rev.* **115**, 2-13 (1959).
3. Goodenough, J. B. Theory of the role of covalence in the perovskite-type manganites [La, M(II)]MnO<sub>3</sub>. *Phys. Rev.* **100**, 564-573 (1955).
4. Kanamori, J. Crystal distortion in magnetic compounds. *J. Appl. Phys.* **31**, S14-S23 (1960).
